# Supplementary material for: Plasma Metabolomics in a Nonhuman Primate Model of Abdominal Radiation Exposure
Source: MDPI journal article supplement (doi:10.3390/metabo11080540), 2021-08-13
Supplement: s1 [file s1]

# Plasma Metabolomics in a Nonhuman Primate Model of Abdominal Radiation Exposure

Se-Ran Jun<sup>1,\*</sup>, Marjan Boerma<sup>2</sup>, Zulema Udaondo<sup>1</sup>, Sasha Richardson<sup>3</sup>, Karla D. Thrall<sup>4</sup>, Isabelle R. Miousse<sup>5</sup>, John Seng<sup>2</sup>, Rupak Pathak<sup>2</sup> and Martin Hauer-Jensen<sup>2</sup>

<sup>1</sup> Department of Biomedical Informatics, University of Arkansas for Medical Sciences, Little Rock, AR 72205, USA; sjun@uams.edu (S.J.); zdominguez@uams.edu (Z.U.)

<sup>2</sup> Division of Radiation Health, University of Arkansas for Medical Sciences, Little Rock, AR 72205, USA; mboerma@uams.edu (M.B.); jeseng@uams.edu (J.S.); rpathak@uams.edu (R.P.); mhjensen@uams.edu (M.H.)

<sup>3</sup> Department of Computer Science, Fayetteville State University, Fayetteville, NC 28301, USA; sfrichardson9@gmail.com (S.R.)

<sup>4</sup> Altasciences Preclinical Seattle, Everett, WA 98203, USA; kthrall@altasciences.com (K.T.)

<sup>5</sup> Department of Biochemistry and Molecular Biology, University of Arkansas for Medical Sciences, Little Rock, AR 72205, USA; iracinemiousse@uams.edu (I.M.)

\* Correspondence: sjun@uams.edu; Tel.: +1-501-686-6025

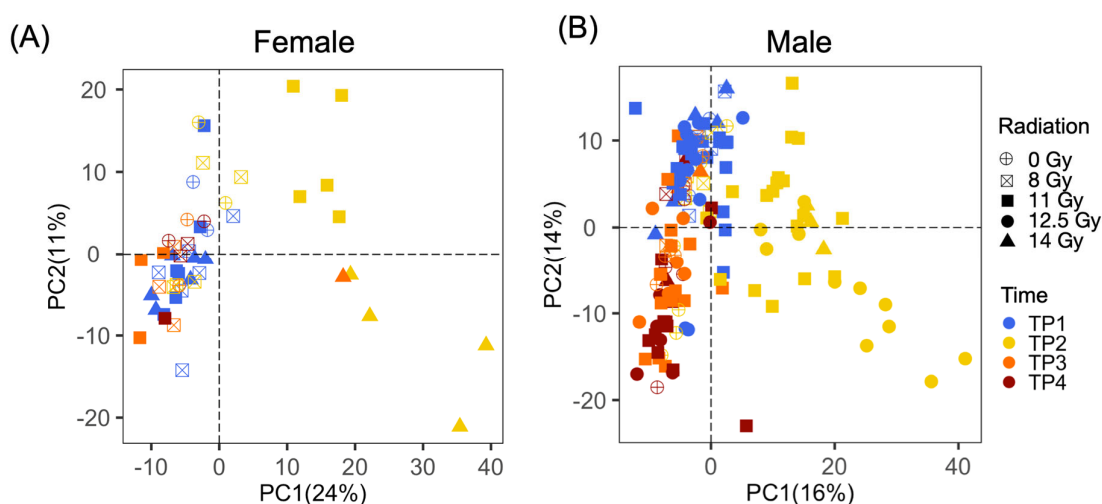

**Figure S1.** PCA plots. (A) female, and (B) male samples. Both male and female radiated samples were well separated from control samples in a similar way at time point TP2. Overall, plasma samples showed gender differences in metabolomics pattern in time points TP3 and TP4.

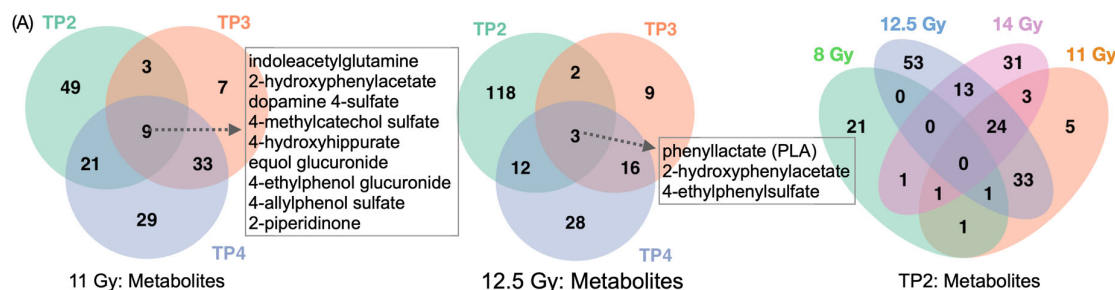

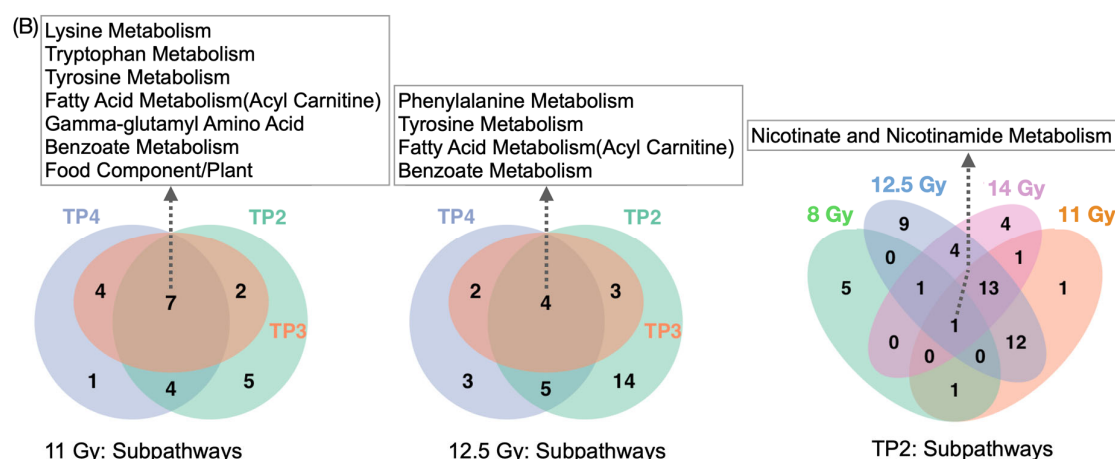

**Figure S2.** Venn diagrams highlighting common and distinct significantly dysregulated (A) metabolites and (B) subpathways before removing metabolites and subpathways to adjust time factor. For both (A) and (B), comparisons between TP1 and TP2, TP3, TP4 and comparisons between 0Gy and 8Gy, 11Gy, 12.5Gy, 14Gy were considered. The four statistical strategies (univariate analysis with p-value < 0.05, fold change greater than 2, OPLS-DA with VIP values greater than 1, subpathway enrichment analysis with p-value < 0.05) were applied to identity significantly dysregulated metabolites and subpathways.

**Table S1.** List of metabolites for intersections in Venn Diagrams in Figure 2(A).

| Treatment | Intersection                    | Metabolite                      | Subpathway                                | Superpathway |
|-----------|---------------------------------|---------------------------------|-------------------------------------------|--------------|
| 11 Gy     | TP1 vs TP2<br>and<br>TP1 vs TP3 | carboxyethyl-GABA               | Glutamate Metabolism                      | Amino Acid   |
|           |                                 | N-acetylglutamine               | Glutamate Metabolism                      | Amino Acid   |
|           |                                 | N-formylanthranilic acid        | Tryptophan Metabolism                     | Amino Acid   |
|           |                                 | 4-methylcatechol sulfate        | Benzoate Metabolism                       | Xenobiotics  |
|           |                                 | equol glucuronide               | Food Component/Plant                      | Xenobiotics  |
|           |                                 | 4-ethylphenol glucuronide       | Food Component/Plant                      | Xenobiotics  |
|           | TP1 vs TP2<br>and<br>TP1 vs TP4 | 2-piperidinone                  | Food Component/Plant                      | Xenobiotics  |
|           |                                 | N-acetyl-1-methylhistidine*     | Histidine Metabolism                      | Amino Acid   |
|           |                                 | hydantoin-5-propionic acid      | Histidine Metabolism                      | Amino Acid   |
|           |                                 | 3-methylglutaconate             | Leucine, Isoleucine and Valine Metabolism | Amino Acid   |
|           |                                 | tigloylglycine                  | Leucine, Isoleucine and Valine Metabolism | Amino Acid   |
|           |                                 | N6,N6,N6-trimethyllysine        | Lysine Metabolism                         | Amino Acid   |
|           |                                 | gamma-glutamyltyrosine          | Gamma-glutamyl Amino Acid                 | Peptide      |
|           |                                 | gamma-glutamylthreonine         | Gamma-glutamyl Amino Acid                 | Peptide      |
|           |                                 | 4-ethylphenylsulfate            | Benzoate Metabolism                       | Xenobiotics  |
|           |                                 | 4-hydroxyhippurate              | Benzoate Metabolism                       | Xenobiotics  |
|           |                                 | homostachydrine*                | Food Component/Plant                      | Xenobiotics  |
|           |                                 | stachydrine                     | Food Component/Plant                      | Xenobiotics  |
|           | TP1 vs TP3<br>and<br>TP1 vs TP4 | 2-piperidinone                  | Food Component/Plant                      | Xenobiotics  |
|           |                                 | 5-aminovalerate                 | Lysine Metabolism                         | Amino Acid   |
|           |                                 | indoleacetylglutamine           | Tryptophan Metabolism                     | Amino Acid   |
|           |                                 | cis-4-decenoylcarnitine (C10:1) | Fatty Acid Metabolism(Acyl Carnitine)     | Lipid        |
|           |                                 | octanoylcarnitine (C8)          | Fatty Acid Metabolism(Acyl Carnitine)     | Lipid        |

|         |                                 |                                 |                                       |             |
|---------|---------------------------------|---------------------------------|---------------------------------------|-------------|
| 12.5 Gy |                                 | stearoylcarnitine (C18)         | Fatty Acid Metabolism(Acyl Carnitine) | Lipid       |
|         |                                 | decanoylcarnitine (C10)         | Fatty Acid Metabolism(Acyl Carnitine) | Lipid       |
|         |                                 | palmitoylcarnitine (C16)        | Fatty Acid Metabolism(Acyl Carnitine) | Lipid       |
|         |                                 | 3-hydroxyhippurate              | Benzoate Metabolism                   | Xenobiotics |
|         |                                 | 2-piperidinone                  | Benzoate Metabolism                   | Xenobiotics |
|         | TP1 vs TP2<br>and<br>TP1 vs TP  | carboxyethyl-GABA               | Glutamate Metabolism                  | Amino Acid  |
|         |                                 | phenyllactate (PLA)             | Phenylalanine Metabolism              | Amino Acid  |
|         | TP1 vs TP2<br>and<br>TP1 vs TP4 | 4-ethylphenylsulfate            | Benzoate Metabolism                   | Xenobiotics |
|         |                                 | phenyllactate (PLA)             | Phenylalanine Metabolisms             | Amino Acid  |
|         |                                 | N-formylanthranilic acid        | Tryptophan Metabolism                 | Amino Acid  |
|         |                                 | 4-ethylphenylsulfate            | Benzoate Metabolism                   | Xenobiotics |
|         |                                 | homostachydrine*                | Food Component/Plant                  | Xenobiotics |
|         |                                 | erythritol                      | Food Component/Plant                  | Xenobiotics |
|         |                                 | stachydrine                     | Food Component/Plant                  | Xenobiotics |
|         | TP1 vs TP3<br>and<br>TP1 vs TP4 | phenyllactate (PLA)             | Phenylalanine Metabolism              | Amino Acid  |
|         |                                 | cis-4-decenoylcarnitine (C10:1) | Fatty Acid Metabolism(Acyl Carnitine) | Lipid       |
|         |                                 | octanoylcarnitine (C8)          | Fatty Acid Metabolism(Acyl Carnitine) | Lipid       |
|         |                                 | decanoylcarnitine (C10)         | Fatty Acid Metabolism(Acyl Carnitine) | Lipid       |
|         |                                 | 4-ethylphenylsulfate            | Benzoate Metabolism                   | Xenobiotics |
